# Supplementary material for: Poria cocos water-soluble polysaccharide modulates anxiety-like behavior induced by sleep deprivation by regulating the gut dysbiosis, metabolic disorders and TNF-α/NF-κB signaling pathway
Source: Royal Society of Chemistry journal article supplement (doi:10.1039/d2fo00811d), 2022-01-01
Supplement: d2fo00811d1.pdf [file d2fo00811d1.pdf]

Supplementary materials

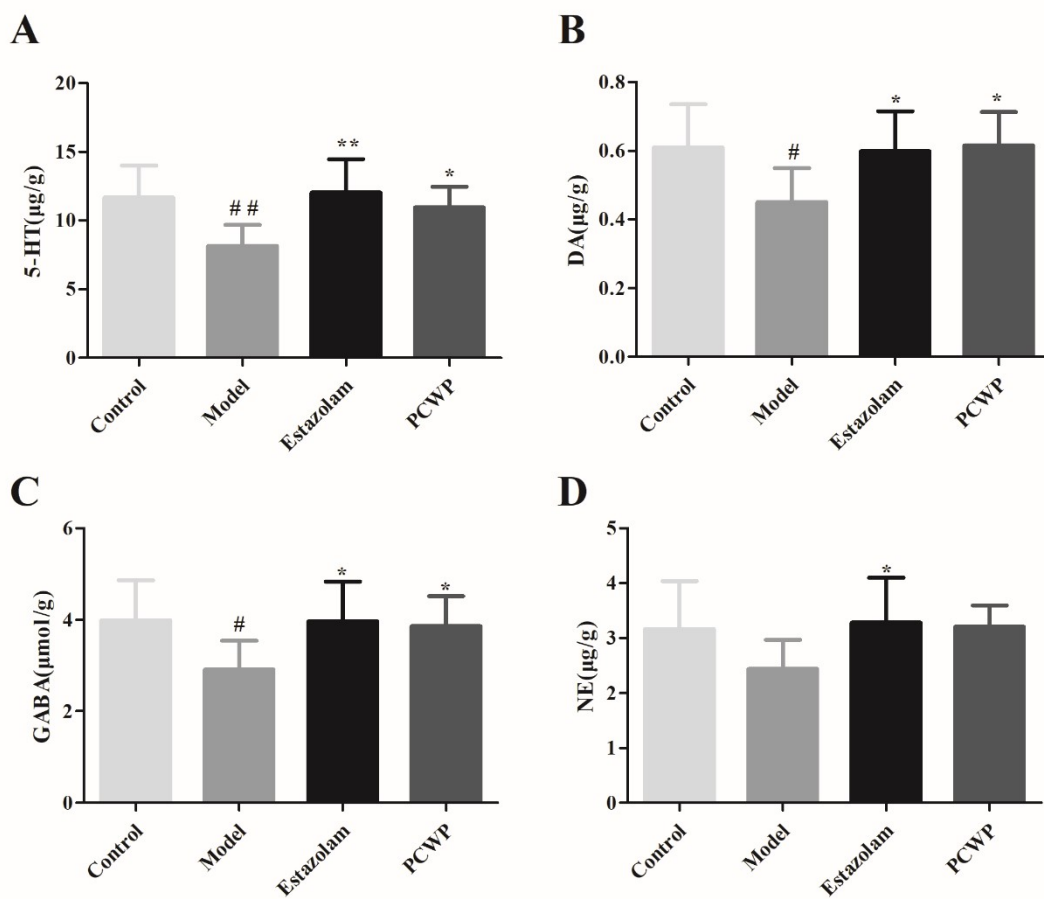

Supplementary Figure 1. Effect of PCWP on the neurotransmitters in the hypothalamus in rats with anxiety disorder. 5-HT (A), DA (B), GABA (C), NE (D). Control: control group; Model: sleep deprivation–induced anxiety disorder group; PCWP: PCWP 100 mg/kg treatment. Results are expressed as mean  $\pm$  standard deviation (SD) ( $\bar{x} \pm s$ ,  $n = 6$ ); # $P < 0.05$ , ## $P < 0.01$ , vs. the control group; \* $P < 0.05$ , \*\* $P < 0.01$ , vs. the model group.

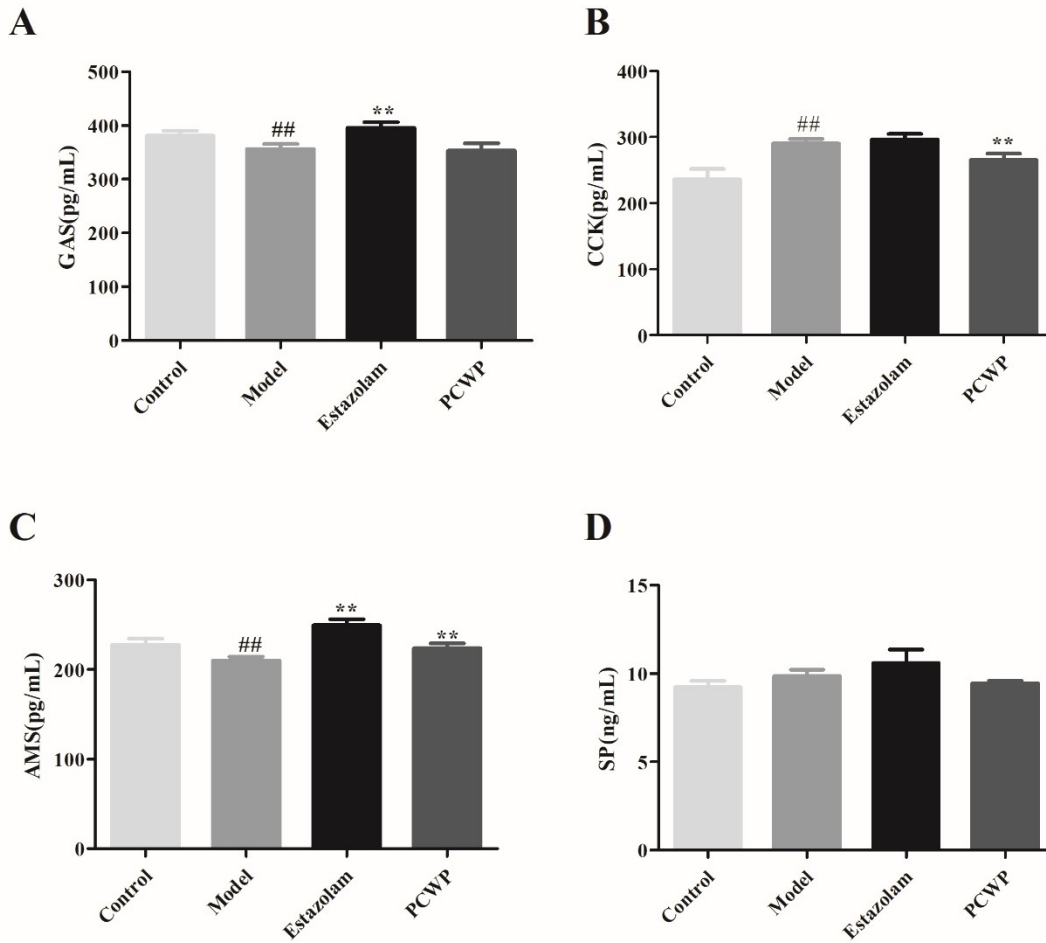

Supplementary Figure 2. Effect of PCWP on serum biochemical parameters GAS (A), CCK(B), AMS(C), and SP(D), in rats with sleep deprivation–induced anxiety disorder. Control: control group; Model: sleep deprivation–induced anxiety disorder group; PCWP: PCWP 100 mg/kg treatment. Results are expressed as mean  $\pm$  standard deviation (SD) ( $\bar{x} \pm s$ ,  $n = 6$ ); <sup>#</sup> $P < 0.05$ , <sup>##</sup> $P < 0.01$ , vs. the control group; <sup>\*</sup> $P < 0.05$ , <sup>\*\*</sup> $P < 0.01$ , vs. the model group.

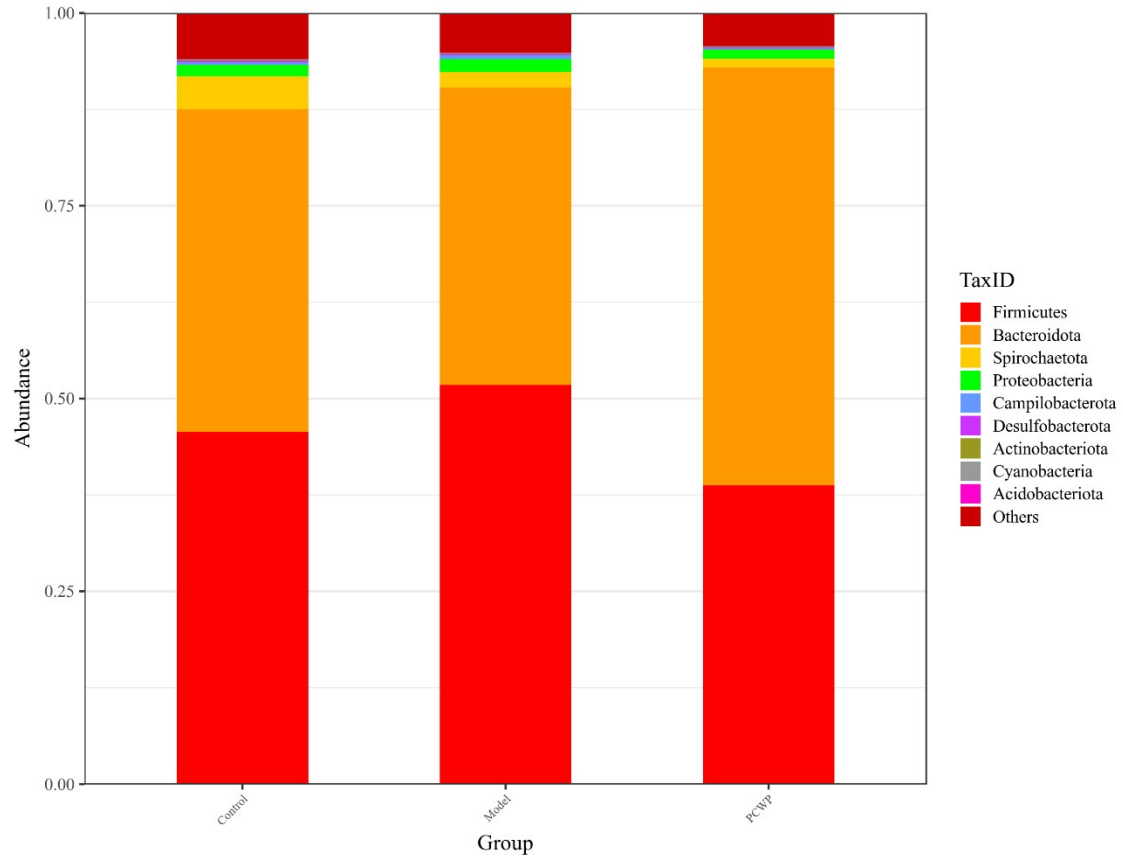

Supplementary Figure 3. Phylum level information of the samples.

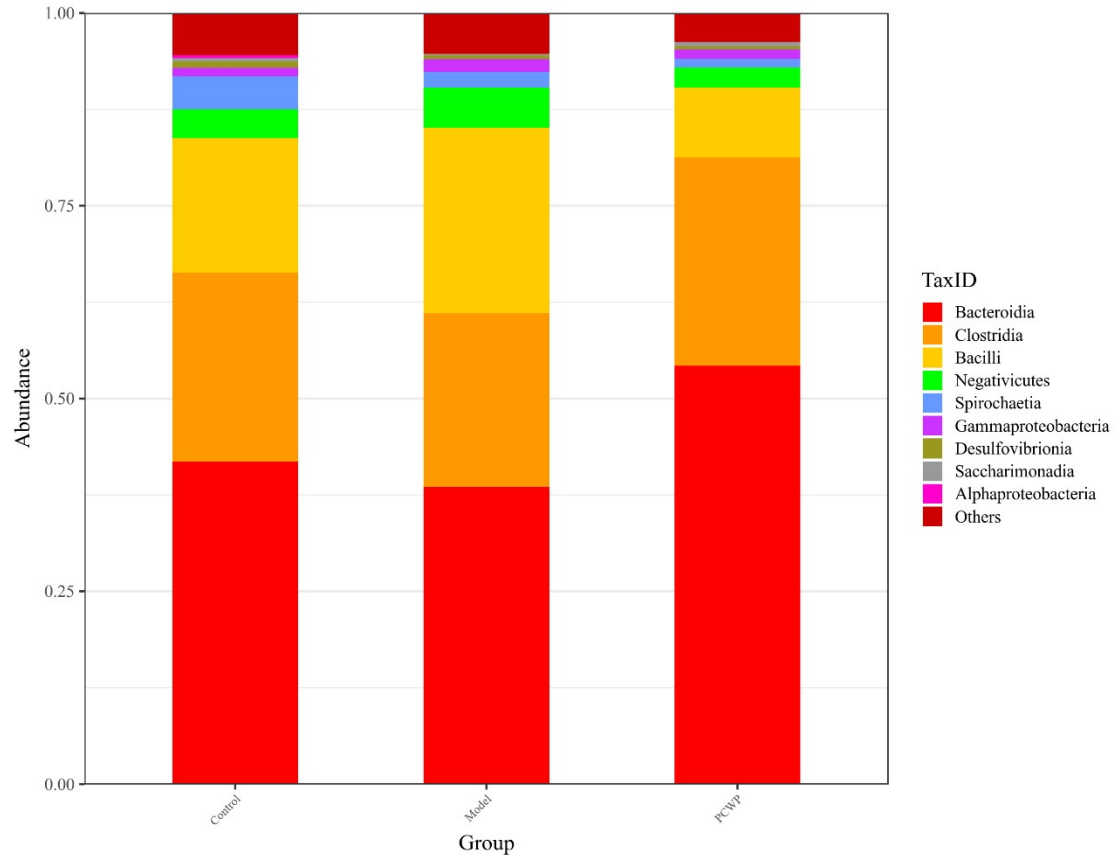

Supplementary Figure 4. Class level information of the samples.

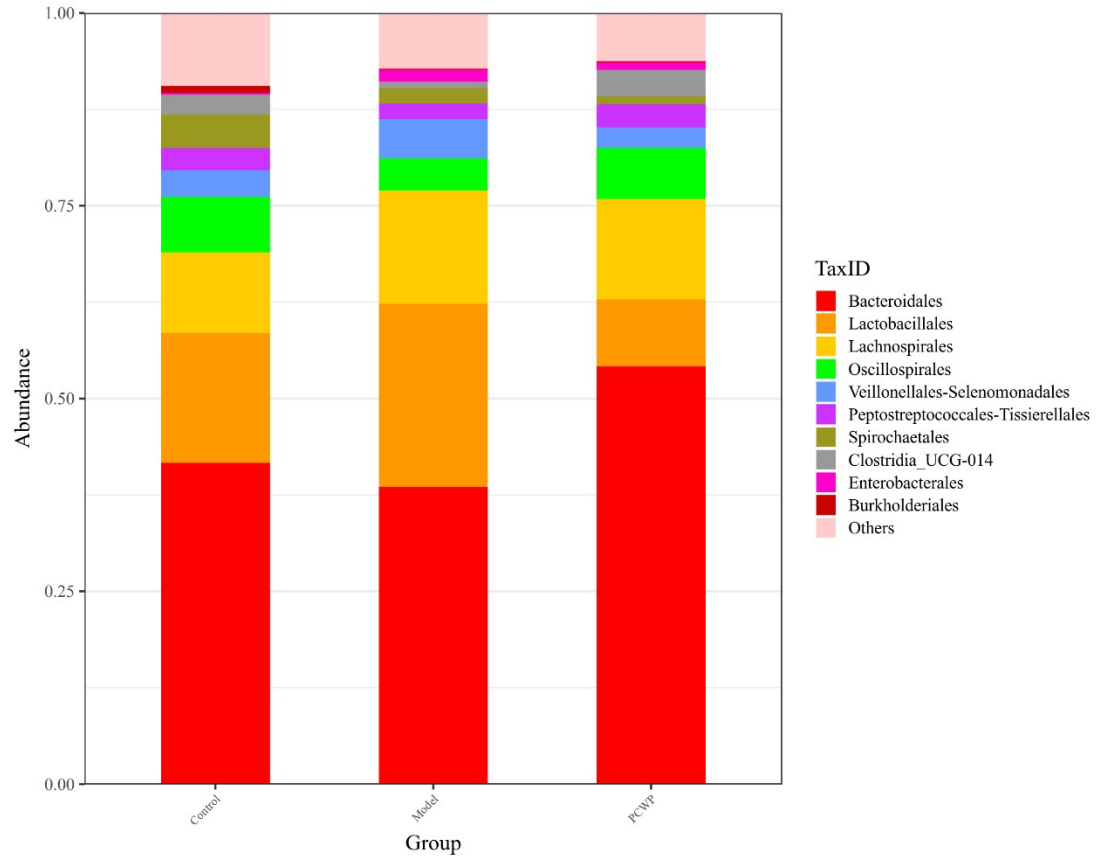

Supplementary Figure 5. Order level information of the samples.

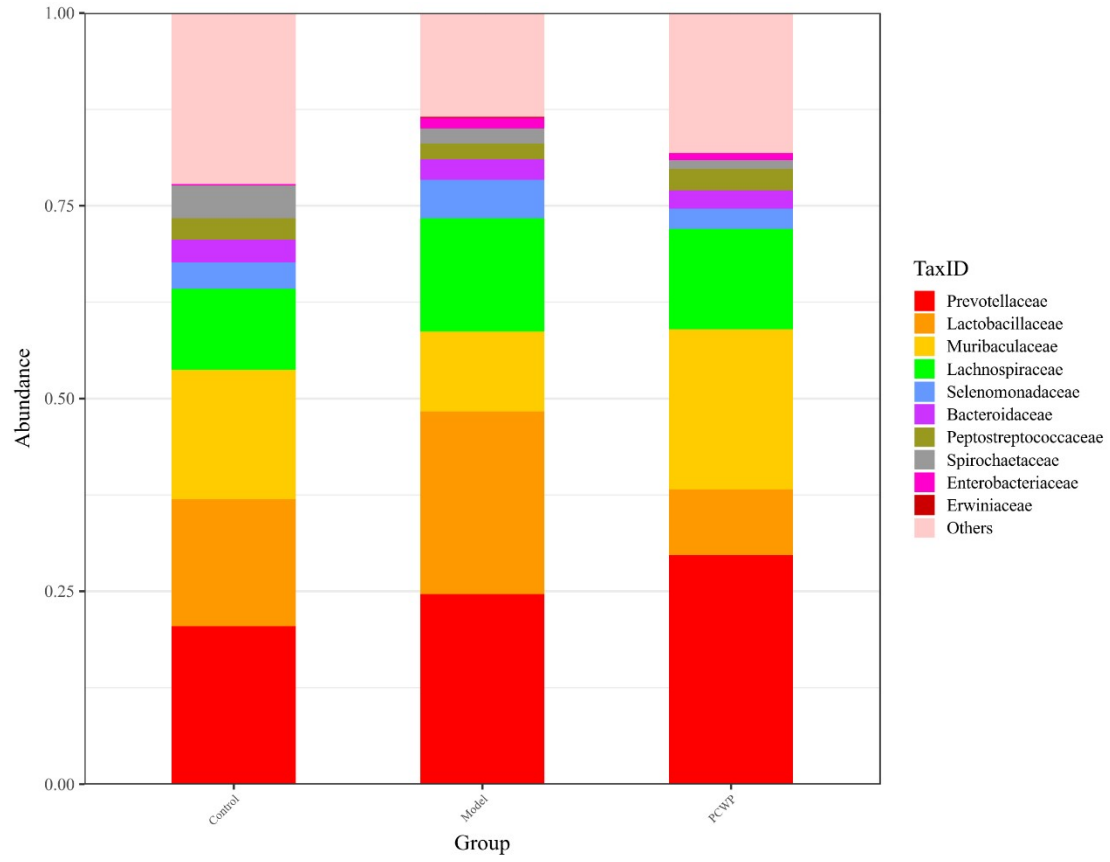

Supplementary Figure 6. Family level information of the samples.

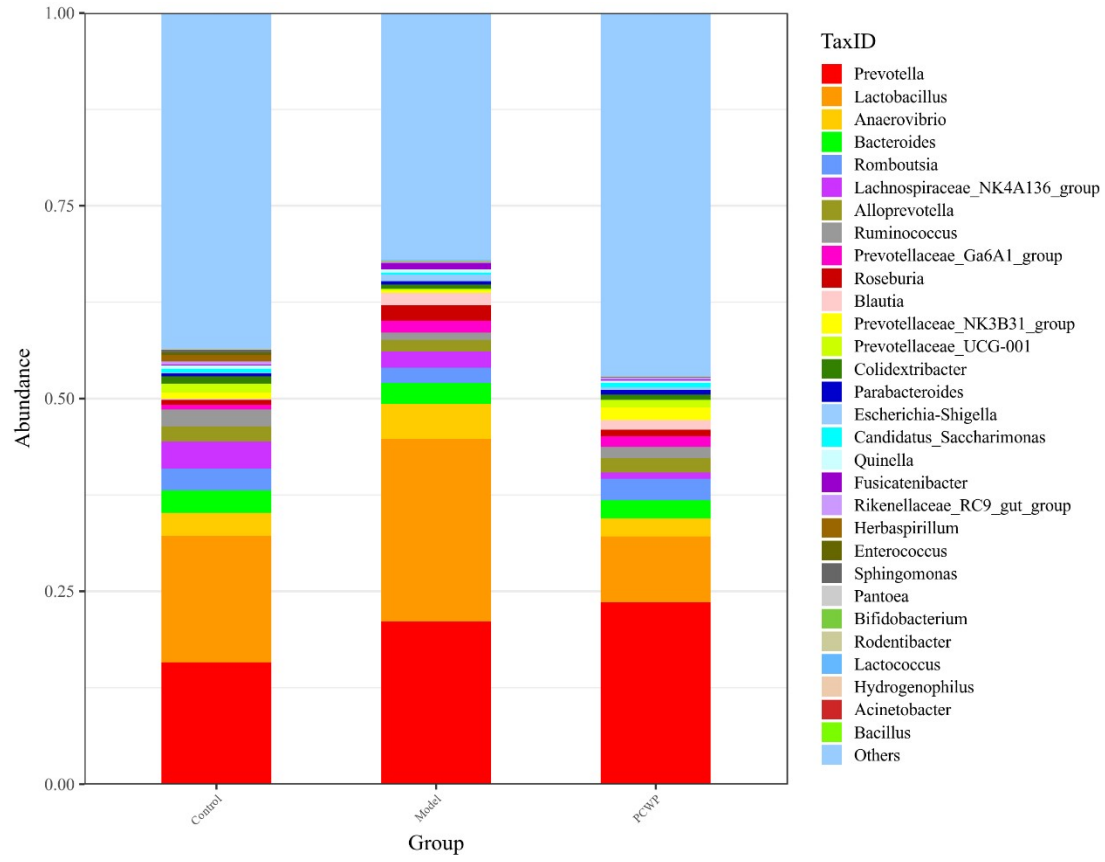

Supplementary Figure 7. Genus level information of the samples.

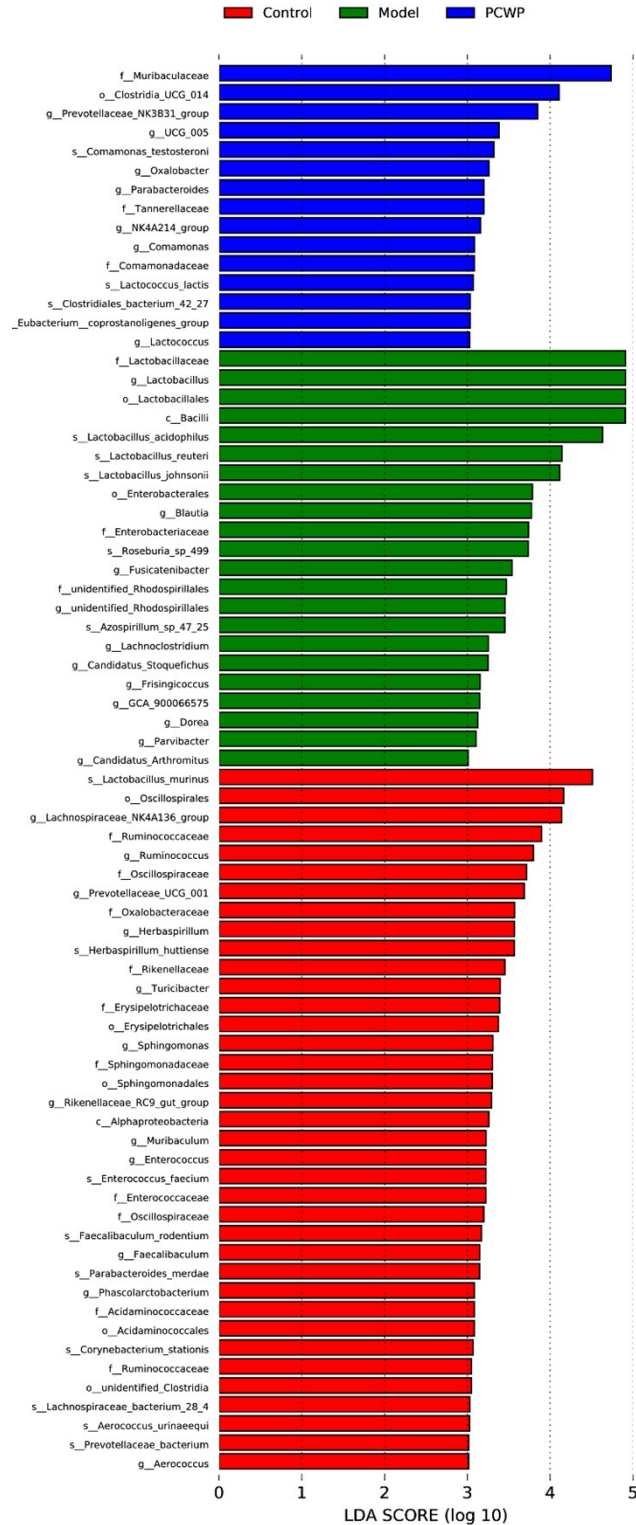

Supplementary Figure 8. Histogram showing the LDA scores, where it indicates the effective size and ranking of each differentially abundant taxon (LDA>3).



## Cladogram

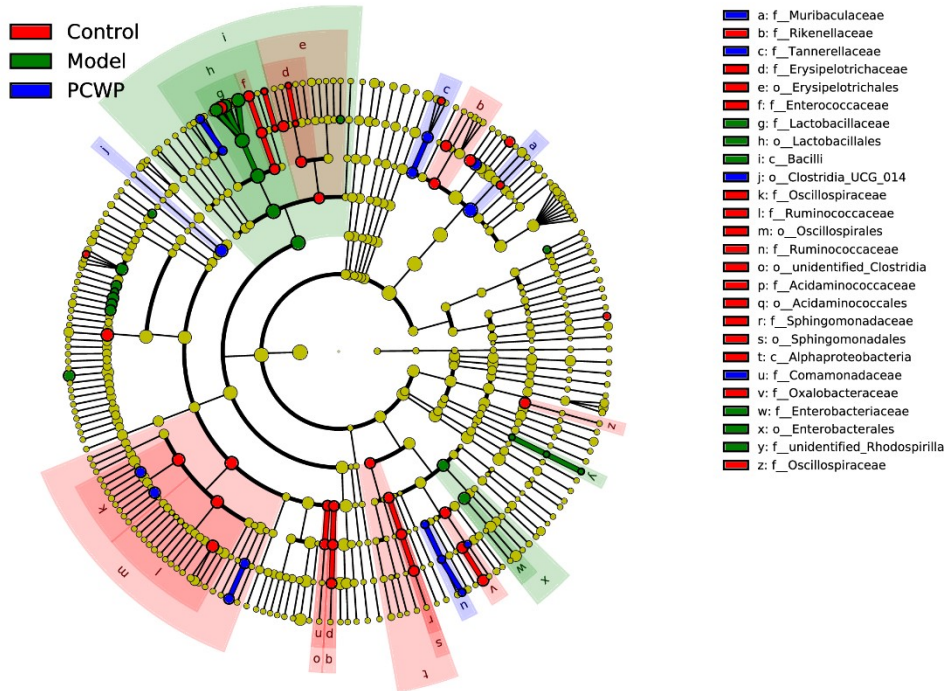

Supplementary Figure 9. Cladogram depicting the output of the LefSe algorithm; significantly distinct taxonomic nodes are colored and branch areas are shaded according to the effect size of the taxa.

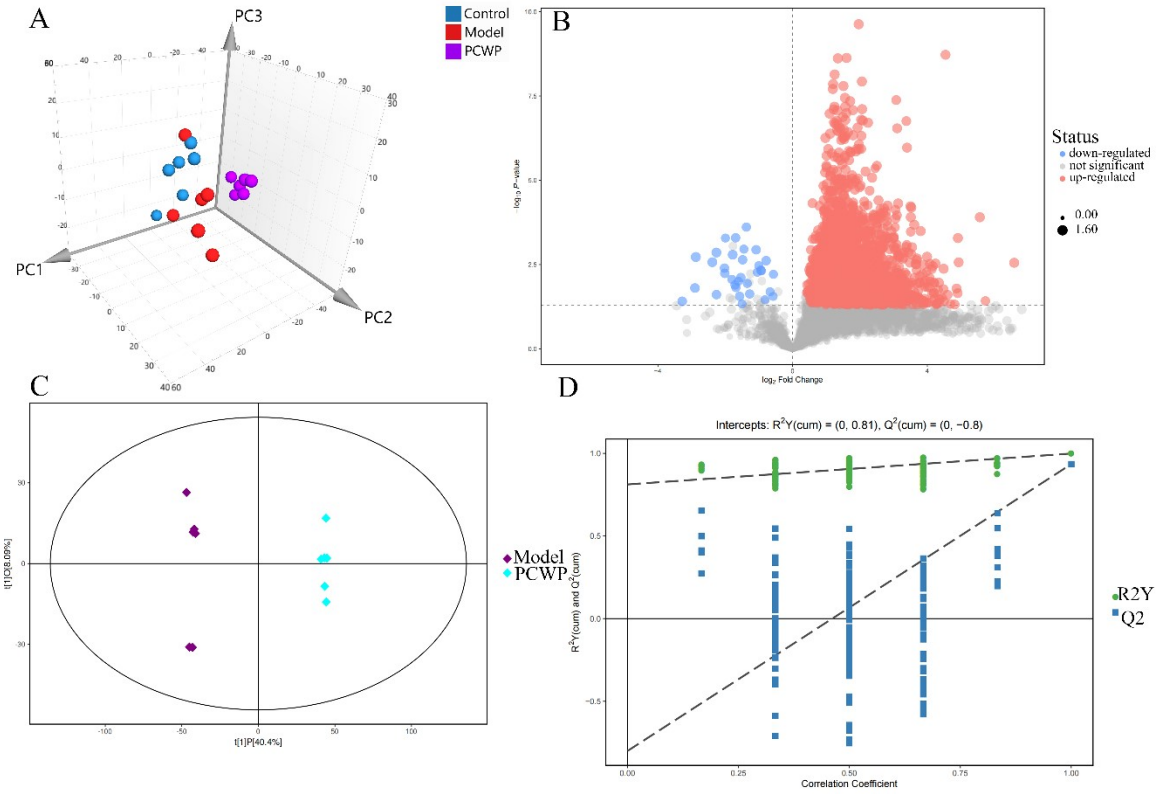

Figure 10. Scatter plots of the PCA score scatter 3D plot (A). Volcano plot of differential fecal metabolites between the model and PCWP (B). OPLS-DA score plot (C). Corresponding validation plot from the OPLS-DA model (D) in the negative-ion mode.

**A**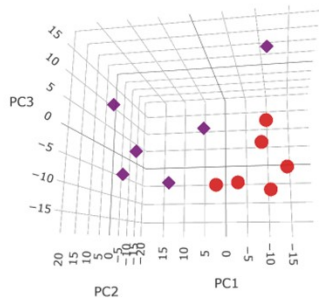

● Control  
◆ Model

**B**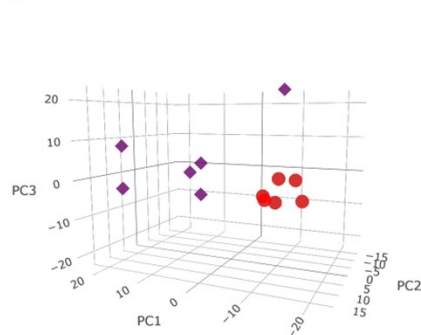

● Control  
◆ Model

**C**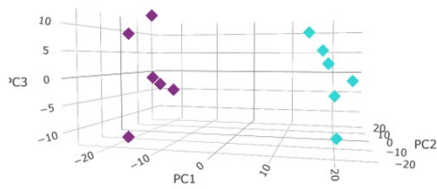

◆ Model  
◆ PCWP

**D**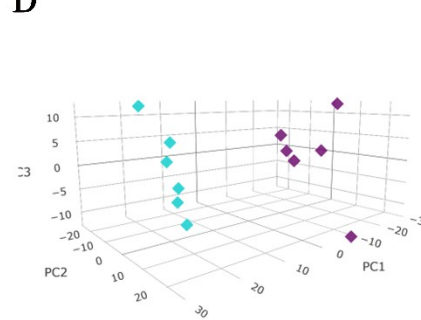

◆ Model  
◆ PCWP

Supplementary Figure 11. Scatter plots of the PCA score scatter 3D plot between control and model (A: positive ion mode, B: negative ion mode), Scatter plots of the PCA score scatter 3D plot between model and PCWP (A: positive ion mode, B: negative ion mode).

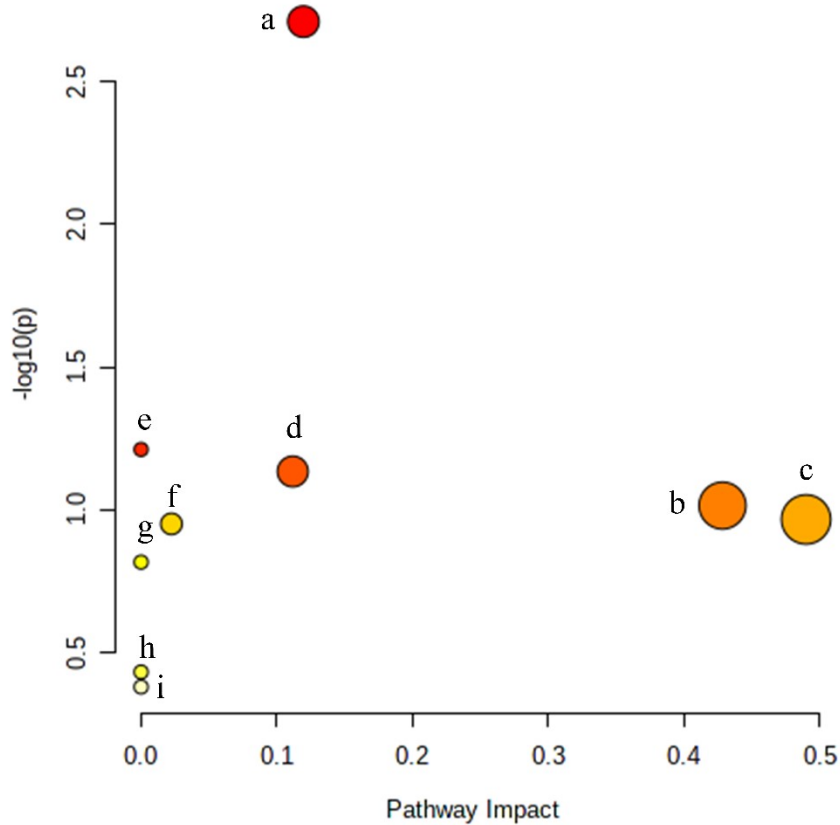

Supplementary Figure 12. Prediction of the metabolic pathway impact in the feces using the KEGG online database. Sphingolipid metabolism (a), taurine and hypotaurine metabolism (b), vitamin B6 metabolism (c), glycerophospholipid metabolism (d), linoleic acid metabolism (e), primary bile acid biosynthesis (f),  $\alpha$ -linolenic acid metabolism (g), arachidonic acid metabolism (h), and tyrosine metabolism (i). The  $-\ln(P)$  values from the pathway enrichment analysis are indicated on the X-axis and impact values on the Y-axis.

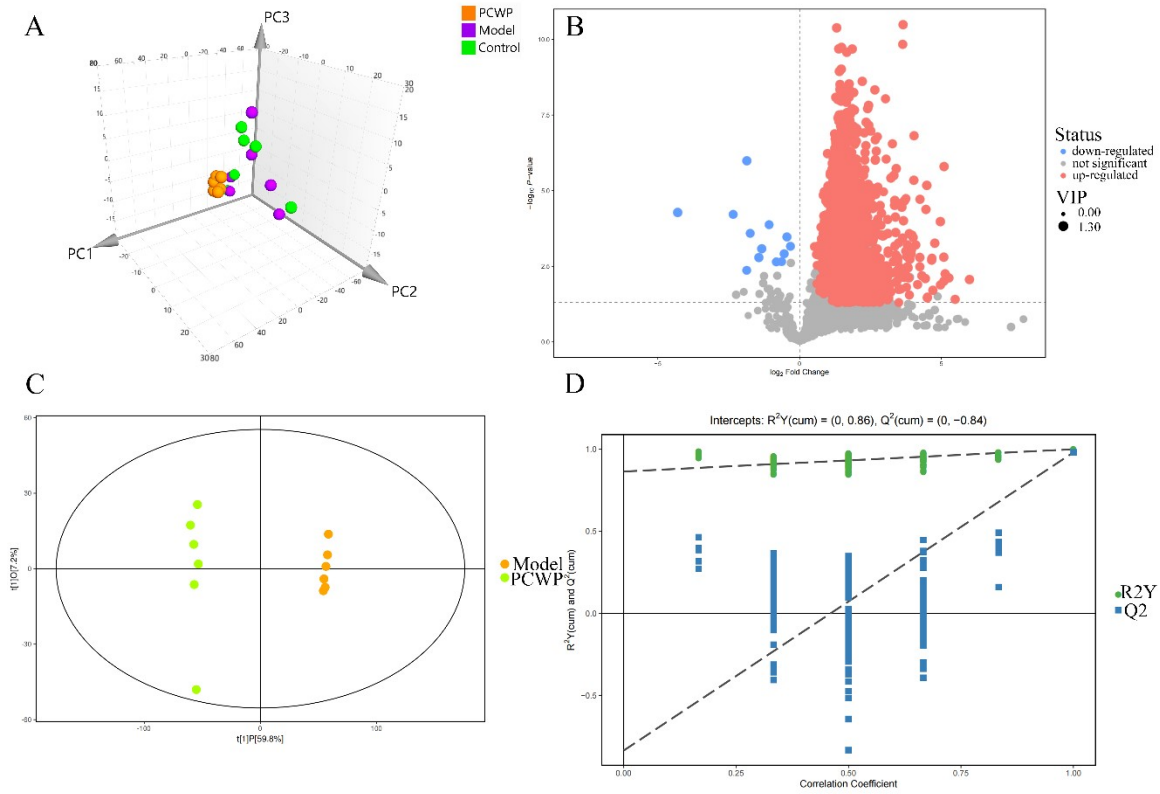

Supplementary Figure 13. Scatter plots of the PCA score scatter 3D plot (A). Volcano plot of differential serum metabolites between the model and PCWP (B). OPLS-DA score plot (C). Corresponding validation plot from the OPLS-DA model (D) in the negative-ion mode.

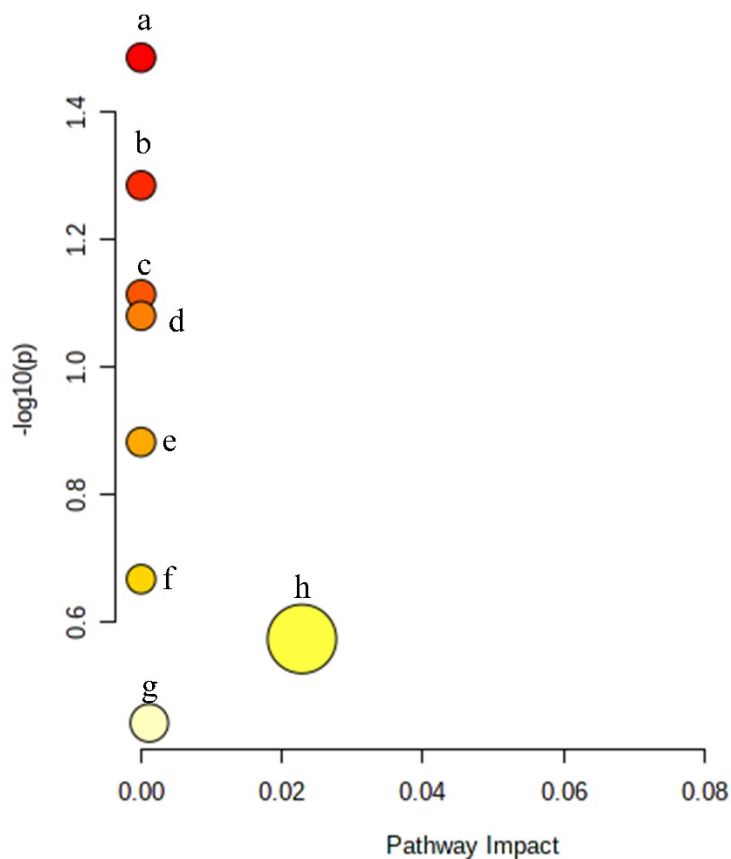

Supplementary Figure 14. Prediction of the metabolic pathway impact in the serum using the KEGG online database. Linoleic acid metabolism (a), taurine and hypotaurine metabolism (b), phenylalanine metabolism (c),  $\alpha$ -linolenic acid metabolism (d), sphingolipid metabolism (e), arachidonic acid metabolism (f), purine metabolism (g), primary bile acid biosynthesis (h), and glycerophospholipid metabolism (i). The  $-\ln(P)$  values from the pathway enrichment analysis are indicated on the X-axis and the impact values on the Y-axis.

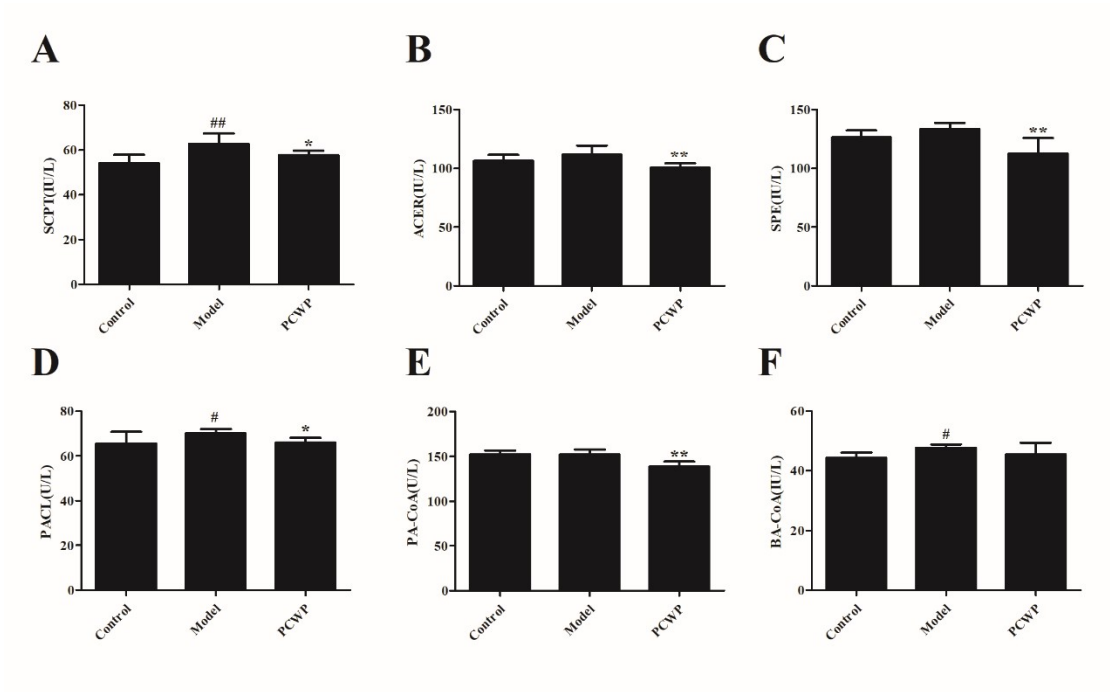

Supplementary Figure 15. Activity of the metabolism-related enzymes in the serum

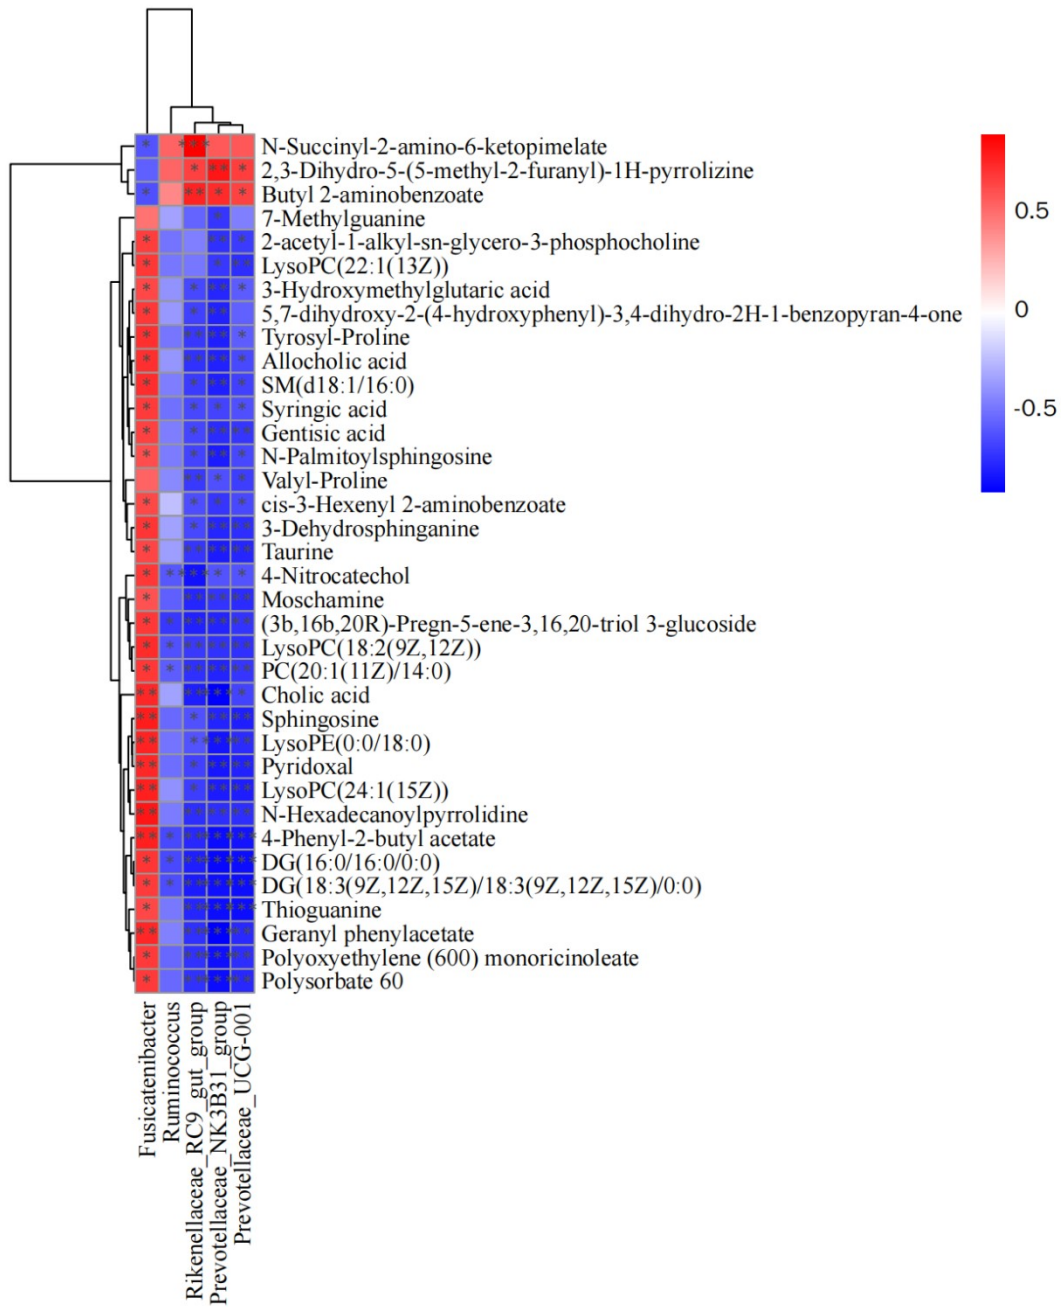

Supplementary Figure 16. Heat maps showing the Spearman's correlation analysis between the gut flora and fecal metabolic profile reversed by PCWP.



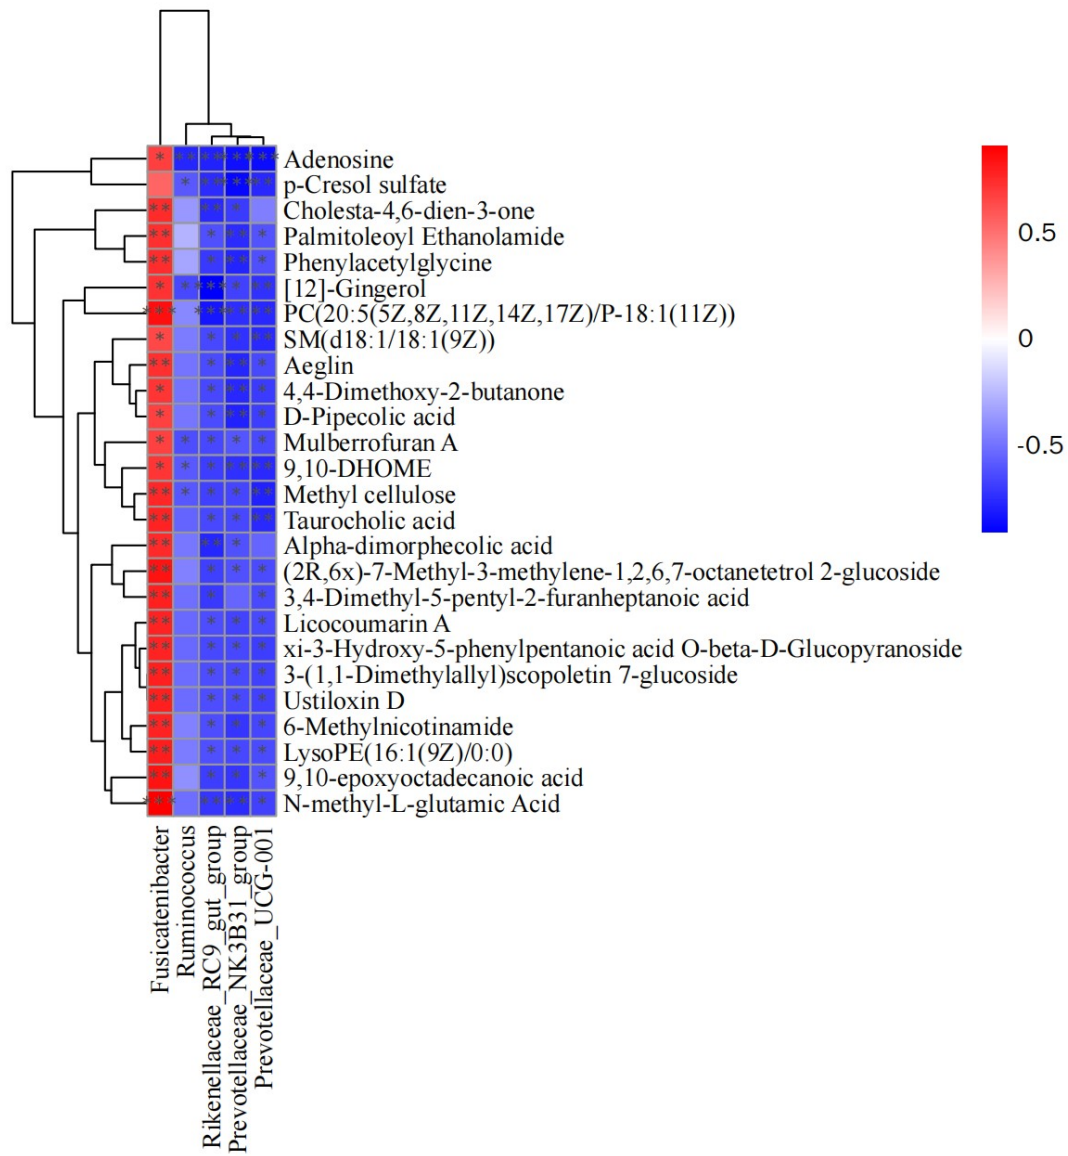

Supplementary Figure 17. Heat maps showing the Spearman's correlation analysis between gut flora and serum metabolic profile reversed by PCWP.

Supplementary Table 1. Potential fecal biomarkers from different groups identified in the positive-ion mode.

| MS2 name                                              | RT (s)  | Mass(m/z) | Chang trend       |                | VIP<br>(PCWP/<br>Model) | P-value<br>(PCWP/<br>Model) |
|-------------------------------------------------------|---------|-----------|-------------------|----------------|-------------------------|-----------------------------|
|                                                       |         |           | Model/<br>Control | PCWP/<br>Model |                         |                             |
| Butyl 2-aminobenzoate                                 | 380.330 | 194.1178  | ↓                 | ↑              | 1.146                   | 0.002                       |
| 3-Dehydrosphinganine                                  | 161.836 | 300.2891  | ↑                 | ↓              | 1.207                   | 0.003                       |
| 6-Chloro-N-(1-methylethyl)-1,3,5-triazine-2,4-diamine | 279.816 | 188.0708  | ↑                 | ↓              | 1.337                   | 0.002                       |
| N-Hexadecanoylpyrrolidine                             | 80.171  | 310.3105  | ↑                 | ↓              | 1.082                   | 0.002                       |
| LysoPE(0:0/18:0)                                      | 219.310 | 482.3234  | ↑                 | ↓              | 1.264                   | 0.001                       |
| Geranyl phenylacetate                                 | 237.634 | 273.1845  | ↑                 | ↓              | 1.302                   | 0.025                       |
| 2,3-Dihydro-5-(5-methyl-2-furanyl)-1H-pyrrolizine     | 241.686 | 188.1069  | ↓                 | ↑              | 1.285                   | 0.005                       |
| Moschamine                                            | 47.751  | 353.1493  | ↑                 | ↓              | 1.262                   | 0.004                       |
| PC(20:1(11Z)/14:0)                                    | 163.667 | 760.5829  | ↑                 | ↓              | 1.295                   | 0.016                       |
| DG(18:3(9Z,12Z,15Z)/18:3(9Z,12Z,15Z)/0:0)             | 30.934  | 613.4792  | ↑                 | ↓              | 1.342                   | 0.000                       |
| (3b,16b,20R)-Pregn-5-ene-3,16,20-triol 3-glucoside    | 262.815 | 497.3036  | ↑                 | ↓              | 1.359                   | 0.005                       |
| DG(16:0/16:0/0:0)                                     | 30.815  | 591.4978  | ↑                 | ↓              | 1.323                   | 0.001                       |
| N-Succinyl-2-amino-6-ketopimelate                     | 411.092 | 290.0861  | ↓                 | ↑              | 1.091                   | 0.022                       |
| SM(d18:1/16:0)                                        | 202.564 | 703.5751  | ↑                 | ↓              | 1.426                   | 0.000                       |
| Valyl-Proline                                         | 353.507 | 215.1391  | ↑                 | ↓              | 1.066                   | 0.012                       |
| Tyrosyl-Proline                                       | 290.487 | 279.1334  | ↑                 | ↓              | 1.426                   | 0.000                       |
| N-Palmitoylsphingosine                                | 33.479  | 538.5194  | ↑                 | ↓              | 1.421                   | 0.000                       |
| Polysorbate 60                                        | 265.929 | 435.2963  | ↑                 | ↓              | 1.357                   | 0.002                       |
| LysoPC(22:1(13Z))                                     | 209.897 | 578.4184  | ↑                 | ↓              | 1.234                   | 0.014                       |
| LysoPC(24:1(15Z))                                     | 207.527 | 606.4489  | ↑                 | ↓              | 1.433                   | 0.001                       |
| LysoPC(18:2(9Z,12Z))                                  | 216.452 | 520.3395  | ↑                 | ↓              | 1.423                   | 0.001                       |

|                                              |         |          |   |   |       |       |
|----------------------------------------------|---------|----------|---|---|-------|-------|
| cis-3-Hexenyl 2-aminobenzoate                | 53.792  | 220.1330 | ↑ | ↓ | 1.179 | 0.013 |
| Polyoxyethylene (600) monoricinoleate        | 219.365 | 341.3051 | ↑ | ↓ | 1.254 | 0.000 |
| 4-Phenyl-2-butyl acetate                     | 237.298 | 193.1226 | ↑ | ↓ | 1.492 | 0.000 |
| 2-acetyl-1-alkyl-sn-glycero-3-phosphocholine | 213.883 | 524.3709 | ↑ | ↓ | 1.231 | 0.001 |
| Sphingosine                                  | 85.716  | 300.2891 | ↑ | ↓ | 1.243 | 0.000 |

Supplementary Table 2. Potential fecal biomarkers from different groups identified in the negative ion mode.

| MS2 name                                                            | RT (s)   | Mass(m/z) | Chang trend   |            | VIP (PCWP/Model) | P-Value (PCWP/Model) |
|---------------------------------------------------------------------|----------|-----------|---------------|------------|------------------|----------------------|
|                                                                     |          |           | Model/Control | PCWP/Model |                  |                      |
| Thioguanine                                                         | 163.402  | 166.0178  | ↑             | ↓          | 1.170            | 0.013                |
| Syringic acid                                                       | 177.075  | 197.0458  | ↑             | ↓          | 1.373            | 0.020                |
| 7-Methylguanine                                                     | 197.001  | 164.0575  | ↑             | ↓          | 1.265            | 0.007                |
| 4-Nitrocatechol                                                     | 106.69   | 154.0143  | ↑             | ↓          | 1.426            | 0.003                |
| Gentisic acid                                                       | 60.429   | 153.0191  | ↑             | ↓          | 1.338            | 0.000                |
| Pyridoxal                                                           | 134.233  | 166.0507  | ↑             | ↓          | 1.416            | 0.004                |
| Allocholic acid                                                     | 195.326  | 407.2802  | ↑             | ↓          | 1.364            | 0.020                |
| Genistein                                                           | 41.2047  | 269.0459  | ↑             | ↓          | 1.222            | 0.009                |
| Cholic acid                                                         | 232.161  | 407.2802  | ↑             | ↓          | 1.401            | 0.015                |
| 5,7-dihydroxy-2-(4-hydroxyphenyl)-3,4-dihydro-2H-1-benzopyran-4-one | 37.96765 | 271.0612  | ↑             | ↓          | 1.267            | 0.001                |
| 3-Hydroxymethylglutaric acid                                        | 379.4005 | 161.0452  | ↑             | ↓          | 1.315            | 0.011                |
| Taurine                                                             | 310.037  | 124.0067  | ↑             | ↓          | 1.235            | 0.027                |

Supplementary Table 3. Potential serum biomarkers from different groups identified in the positive-ion mode.

| MS2 name                                                      | RT(s)   | Mass(m/z) | Chang trend       |                | VIP<br>(PCWP/<br>Model) | P-Value<br>(PCWP/<br>Model) |
|---------------------------------------------------------------|---------|-----------|-------------------|----------------|-------------------------|-----------------------------|
|                                                               |         |           | Model/<br>Control | PCWP/<br>Model |                         |                             |
| (2R,6x)-7-Methyl-3-methylene-1,2,6,7-octanetetrol 2-glucoside | 64.290  | 367.1956  | ↑                 | ↓              | 1.158                   | 0.002                       |
| Taurocholic acid                                              | 78.094  | 516.3015  | ↑                 | ↓              | 1.146                   | 0.003                       |
| Ustiloxin D                                                   | 277.650 | 495.2415  | ↑                 | ↓              | 1.153                   | 0.003                       |
| Aeglin                                                        | 277.748 | 511.2146  | ↑                 | ↓              | 1.150                   | 0.003                       |
| 6-Methylnicotinamide                                          | 57.482  | 151.0964  | ↑                 | ↓              | 1.181                   | 0.001                       |
| SM(d18:1/18:1(9Z))                                            | 201.102 | 729.5889  | ↑                 | ↓              | 1.055                   | 0.001                       |
| Adenosine                                                     | 178.446 | 268.1038  | ↑                 | ↓              | 1.179                   | 0.013                       |
| 4,4-Dimethoxy-2-butanone                                      | 56.762  | 133.0859  | ↑                 | ↓              | 1.184                   | 0.001                       |
| Methyl cellulose                                              | 70.848  | 455.2476  | ↑                 | ↓              | 1.145                   | 0.007                       |
| Cholesta-4,6-dien-3-one                                       | 32.022  | 383.3304  | ↑                 | ↓              | 1.127                   | 0.000                       |
| Licocoumarin A                                                | 276.069 | 407.1885  | ↑                 | ↓              | 1.167                   | 0.003                       |
| D-Pipecolic acid                                              | 57.578  | 130.0863  | ↑                 | ↓              | 1.188                   | 0.001                       |
| Palmitoleoyl Ethanolamide                                     | 86.557  | 298.2738  | ↑                 | ↓              | 1.111                   | 0.000                       |
| 3-(1,1-Dimethylallyl)scopoletin 7-glucoside                   | 275.992 | 423.1622  | ↑                 | ↓              | 1.158                   | 0.004                       |
| xi-3-Hydroxy-5-phenylpentanoic acid O-beta-D-Glucopyranoside  | 274.269 | 379.1367  | ↑                 | ↓              | 1.148                   | 0.005                       |
| LysoPE(16:1(9Z)/0:0)                                          | 202.240 | 452.2768  | ↑                 | ↓              | 1.116                   | 0.022                       |
| Alpha-dimorphecolic acid                                      | 87.402  | 279.2313  | ↑                 | ↓              | 1.166                   | 0.003                       |
| Phenylacetyl glycine                                          | 205.989 | 194.0807  | ↑                 | ↓              | 1.012                   | 0.006                       |
| Mulberrofuran A                                               | 74.494  | 393.2096  | ↑                 | ↓              | 1.053                   | 0.001                       |
| PC(20:5(5Z,8Z,11Z,14Z,17Z)/P-18:1(11Z))                       | 153.323 | 790.5741  | ↑                 | ↓              | 1.010                   | 0.013                       |
| 3,4-Dimethyl-5-pentyl-2-furanheptanoic acid                   | 49.620  | 295.2262  | ↑                 | ↓              | 1.093                   | 0.003                       |

Supplementary Table 4. Potential serum biomarkers from different groups identified in the negative-ion mode.

| MS2 name | RT (s) | Mass(m/z) | Chang trend       |                | VIP<br>(PCWP/<br>Model) | P-Value<br>(PCWP /<br>Model) |
|----------|--------|-----------|-------------------|----------------|-------------------------|------------------------------|
|          |        |           | Model/<br>Control | PCWP/<br>Model |                         |                              |

---

|                             |         |          |   |   |       |       |
|-----------------------------|---------|----------|---|---|-------|-------|
| N-methyl-L-glutamic Acid    | 12.185  | 160.0613 | ↑ | ↓ | 1.149 | 0.008 |
| p-Cresol sulfate            | 24.351  | 187.0067 | ↑ | ↓ | 1.011 | 0.004 |
| [12]-Gingerol               | 152.455 | 377.27   | ↑ | ↓ | 1.228 | 0.010 |
| 9,10-epoxyoctadecanoic acid | 50.376  | 297.2441 | ↑ | ↓ | 1.225 | 0.001 |
| 9,10-DHOME                  | 91.089  | 313.2394 | ↑ | ↓ | 1.252 | 0.001 |

---
